# Supplementary material
Source: PubMed Central journal article supplement (PMC6949532)
Supplement: NIHMS1004095-supplement-Supplemental_Figure.pdf [file NIHMS1004095-supplement-Supplemental_Figure.pdf]

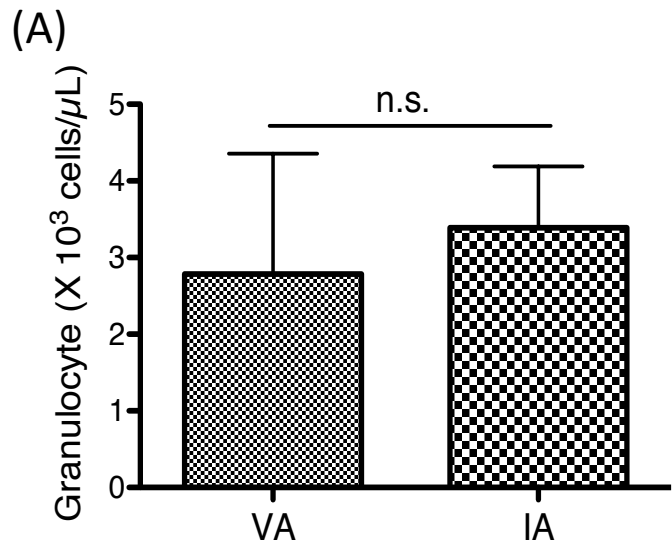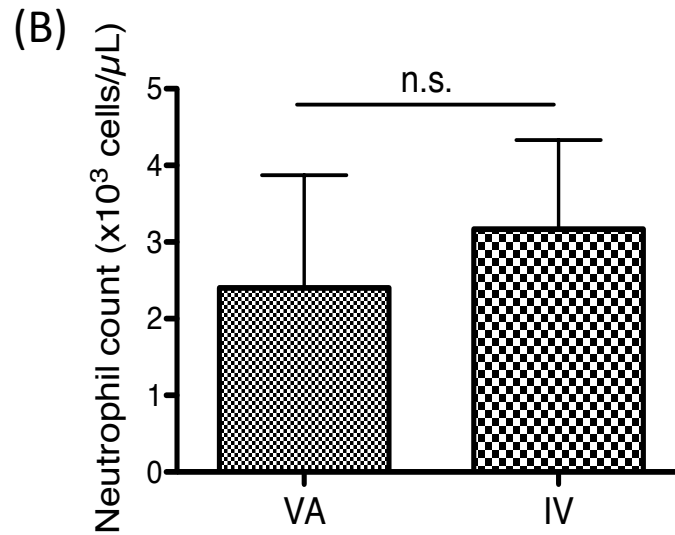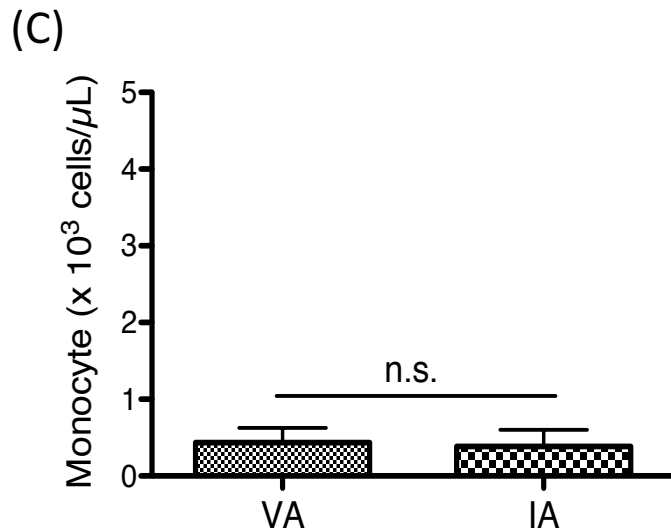

**Supplemental Figure 1. Comparison of granulocyte, neutrophil, and monocyte counts**

The preoperative counts of granulocytes (A), neutrophils (B) and monocytes (C) were compared between VA and IA groups. Data were shown as median + interquartile range. Statistical analysis was performed using Mann-Whitney test. n.s. = not significant.
